# Supplementary material
Source: Research Square preprint supplement (doi:10.21203/rs.3.rs-9178989/v1)
Supplement: Supplementary file 1 [file 25d3f4835612edcbd2db0d1a.docx]

Table1:Demographic and Clinical Data of the four Groups of participants

| Variable | MDD/SA(n= 50) | MDD/NSSI(n = 54) | sMDD(n= 68) | HCs  (n = 66) | Overall p-value | MDD/SA vs MDD/NSSI p-value |
| --- | --- | --- | --- | --- | --- | --- |
| Age（years） | 24.3 ± 4.59 | 20.8 ± 3.6 | 20.3±1.9 | 21.1 ± 2.0 | 0.000* | 0.000* |
| Gender（Male/Female） | 20:30 | 6:48 | 12:56 | 8:58 | 0.000* | 0.001* |
| Years of Education（years） | 13.6± 2.7 | 13.0 ± 2.2 | 13.0 ± 1.8 | 13.6 ± 1.5 | 0.166 | 0.170 |
| Total Duration of Illness（years） | 4.4 ± 2.9 | 3.5 ± 3.0 | 3.7 ± 2.8 | - | - | 0.144 |
| Borderline Personality（yes/no） | 5:45 | 9:45 | 0:68 | 0:66 | 0.000*c | 0.320 |
| Family History（yes/no） | 19:31 | 17:37 | 24:44 | 0:66 | 0.000*c | 0.540 |
| Childhood Abuse（yes/no） | 7:43 | 16:38 | 7:61 | 0:66 | 0.000*c | 0.055 |
| History of Suicide Attempts（yes/no） | 50:0 | 9:45 | 0:68 | 0:66 | 0.000*c | 0.000*c |
| Self-harm Ideation（yes/no） | 50:0 | 41:13 | 33:35 | 0:66 | 0.000*c | 0.000*c |
| HAMD17 Total Score | 26.5 ± 6.4 | 22.8 ± 4.3 | 21.5 ± 4.6 | 2.6 ± 1.1 | 0.000* | 0.000* |
| HAMA Total Score | 15.6 ± 5.7 | 13.2 ± 5.0 | 14.5 ± 5.9 | 2.6 ± 1.2 | 0.000* | 0.023* |
| NGASR Total Score | 12.1 ± 1.6 | 9.9 ± 3.0 | 6.2 ± 2.5 | - | 0.000* | 0.000* |
| CRSNSSI Total Score | 0 ± 0 | 3.2 ± 0.8 | 0 ± 0 | - | - | - |
| Medication（SSRI/SNRI） | 22:28 | 32:22 | 40:28 | - | - | 0.120 |
