# Supplementary material
Source: Research Square preprint supplement (doi:10.21203/rs.3.rs-9178989/v1)
Supplement: Supplementary file 2 [file 8f2306ed083150a53c03e0ca.docx]

Table 2 :Gray Matter Valume Differences In Brain Regions Across The Four Groups

| Brain Region（AAL） | Peak MNICoordinates（x，y，z） | Cluster Size | Peak F/tValue |
| --- | --- | --- | --- |
| Brain Regions with Group Differences | | | |
| Right Superior Frontal Gyrus/Middle Frontal Gyrus | 11 33 -24 | 2163 | 16.603 |
| Right Caudate Nucleus | 14 -2 20 | 5122 | 11.765 |
| Left Superior Frontal Gyrus/Right Superior Frontal Gyrus | 2 63 27 | 3898 | 11.199 |
| Right Superior Temporal Gyrus/Middle Temporal Gyrus | 63 -14 12 | 3836 | 13.438 |
| Left Caudate Nucleus | -6 15 5 | 2661 | 11.485 |
| Left Cingulate Gyrus(Middle)/Right Cingulate Gyrus(Middle) | -2 -44 50 | 1148 | 9.977 |
| MDD/SA VS MDD/NSSI | | | |
| Right Middle Frontal Gyrus | 5 39 -24 | 2132 | -6.943 |
| Right Caudate Nucleus | 12 -3 21 | 5120 | -5.507 |
| Right Middle Temporal Gyrus | 66 -30 -2 | 2460 | -5.757 |
| Left Cingulate Gyrus(Middle) | -2 45 50 | 3679 | -5.493 |
| Left Caudate Nucleus | -14 8 0 | 2661 | -5.492 |
| Right Superior Temporal Gyrus | 63 -14 12 | 1227 | -3.921 |
| Right Cingulate Gyrus(Middle) | 5 -33 38 | 1146 | -5.649 |
| MDD/SA VS sMDD | | | |
| Right Superior Frontal Gyrus | 17 35 -23 | 535 | -4.823 |
| MDD/SA VS HCs | | | |
| Right Superior Temporal Gyrus/Right Amygdate | 21 0 -18 | 384 | -4.217 |
| Right Middle Temporal Gyrus | 54 -11 -17 | 213 | -4.317 |
| Right Caudate Nucleus | 14 15 21 | 150 | -3.831 |
